# Iodothyronine Levels in the Human Developing Brain: Major Regulatory Roles of Iodothyronine Deiodinases in Different Areas

MONIQUE H. A. KESTER, RAQUEL MARTINEZ DE MENA, MARIA JESUS OBREGON, DANIJELA MARINKOVIC, ALLAN HOWATSON, THEO J. VISSER, ROBERT HUME, AND GABRIELLA MORREALE DE ESCOBAR

Department of Internal Medicine (M.H.A.K., D.M., T.J.V.), Erasmus University Medical Center, 3000 DR Rotterdam, The Netherlands; Departamento de Endocrinología (R.M.d.M., M.J.O., G.M.d.E.), Instituto de Investigaciones Biomédicas Albert Sols, Consejo Superior de Investigaciones Científicas-UAM, 28029 Madrid, Spain; Pathology Department (A.H.), Royal Hospital for Sick Children, Yorkhill National Health Service Trust, Glasgow G3 8SJ, Scotland, United Kingdom; and Maternal and Child Health Sciences (R.H.), University of Dundee, Dundee DD1 9SY, Scotland, United Kingdom

Thyroid hormones are required for human brain development, but data on local regulation are limited. We describe the ontogenic changes in  $T_4$ ,  $T_3$ , and  $rT_3$  and in the activities of the types I, II, and III iodothyronine deiodinases (D1, D2, and D3) in different brain regions in normal fetuses (13–20 wk postmenstrual age) and premature infants (24–42 wk postmenstrual age). D1 activity was undetectable.

The developmental changes in the concentrations of the iodothyronines and D2 and D3 activities showed spatial and temporal specificity but with divergence in the cerebral cortex and cerebellum.  $T_3$  increased in the cortex between 13 and 20 wk to levels higher than adults, unexpected given the low circulating  $T_3$ . Considerable D2 activity was found in the cortex, which correlated positively with  $T_4$  ( $r = 0.65$ ). Cortex D3 activity was very low, as was D3 activity in germinal eminence

and choroid plexus. In contrast, cerebellar  $T_3$  was very low and increased only after midgestation. Cerebellum D3 activities were the highest (64 fmol/min·mg) of the regions studied, decreasing after midgestation. Other regions with high D3 activities (midbrain, basal ganglia, brain stem, spinal cord, hippocampus) also had low  $T_3$  until D3 started decreasing after midgestation. D3 was correlated with  $T_3$  ( $r = -0.682$ ) and  $rT_3/T_3$  ( $r = 0.812$ ) and  $rT_3/T_4$  ( $r = 0.889$ ).

Our data support the hypothesis that  $T_3$  is required by the human cerebral cortex before midgestation, when mother is the only source of  $T_4$ . D2 and D3 play important roles in the local bioavailability of  $T_3$ .  $T_3$  is produced from  $T_4$  by D2, and D3 protects brain regions from excessive  $T_3$  until differentiation is required. (*J Clin Endocrinol Metab* 89: 3117–3128, 2004)

THYROID HORMONE IS necessary for normal brain development. It becomes increasingly clear that the levels of thyroid hormones required at different stages of development are critical. Conditions relating thyroid hormones to poor brain development have recently been summarized in a review by Morreale de Escobar *et al.* (1). For instance, congenital hypothyroidism leads to severe mental retardation if it remains untreated. Maternal hypothyroxinemia caused by marked iodine deficiency during the first half of pregnancy is also causally related to neurological cretinism (2) and a decreased mental development of a large proportion of the noncretin population (3). Even undiagnosed early maternal hypothyroxinemia (4, 5) or hypothyroidism (6) has been suggested to adversely affect neurological development of the child. Not only maternal and/or fetal and neonatal hypothyroidism clearly affect brain development, but also

excessive levels of thyroid hormones may lead to abnormal brain development (7).

Nuclear thyroid hormone receptors have been demonstrated in the brain from wk 10 (8). In the first trimester, the fetus is solely dependent on maternal thyroid hormones, which cross the human placenta (9–11). From midgestation, secretion of thyroid hormone by the fetal thyroid becomes increasingly important (12), although the maternal contribution of thyroid hormone persists until birth (13) and may still play a critical role in the preferential protection of the fetal brain from  $T_3$  deficiency (11). Serum  $T_3$  levels are very low during fetal development, ranging from less than 33 ng/dl (0.5 nM) at 13 wk postmenstrual age (PMA) (14) up to approximately 65 ng/dl (1.0 nM) at term (15). Despite these very low serum concentrations, Bernal and Pekonen (8) and Bernal and colleagues (16, 17) measured  $T_3$  in several fetal tissues between 13 and 18 wk PMA. Their studies showed that the concentration of  $T_3$  in the fetal cortex at 13 wk PMA may actually reach 50–60% of the values reported for adults (18), with 20–30% nuclear receptor occupancy. The concentrations both of the nuclear receptors and total  $T_3$  in the cerebral cortex continue to increase rapidly up to 18 wk gestation. This does not occur during the same developmental period in other fetal tissues, such as the lung and liver, and

Abbreviations: BG, Basal ganglia; BS, brain stem; Cbl, cerebellum; CC, cerebral cortex; CP, choroid plexus; D1, D2, D3, types I, II, and III deiodinase; DTT, dithiothreitol; GE, germinal eminence; H, hippocampus; MB, midbrain; PMA, postmenstrual age; PTU, 6-n-propyl-2-thiouracil; SC, spinal cord.

JCEM is published monthly by The Endocrine Society (<http://www.endo-society.org>), the foremost professional society serving the endocrine community.

there is no information for brain areas other than the cortex. The  $T_3$  levels of the human fetal cortex are much higher than would be expected from the serum  $T_3$  levels, a finding that may be explained by the active transport of thyroid hormone through the plasma membrane, the difference in intracellular *vs.* extracellular thyroid hormone-protein binding, and mainly by local deiodination of iodothyronines (19, 20).

Deiodination is catalyzed by three deiodinases, *i.e.* types I, II, and III deiodinase (D1, D2, and D3). D1 is mainly expressed in the liver, kidney, and thyroid. Its main function is the production of serum  $T_3$  and the clearance of serum  $rT_3$  (20–22). D1 is not expressed in cells of the central nervous system. D2 is present in brain, pituitary, brown adipose tissue, human thyroid, and skeletal muscle (20, 23–25). It catalyzes the outer ring deiodination of  $T_4$  to  $T_3$  and is thus important for the local production of  $T_3$ . D2 expression in the different tissues is down-regulated in hyperthyroidism and up-regulated in hypothyroidism (23). In the rat, D2 has been demonstrated in astrocytes throughout the brain, in the median eminence and tanycytes lining the third ventricle (26, 27). D3 catalyzes the inner ring deiodination of  $T_4$  to  $rT_3$  and of  $T_3$  to  $3,3'$ - $T_2$  (20–22). It is expressed in brain, skin, fetal tissues, placenta, and uterus and at other sites of the maternal-fetal interface, such as the umbilical arteries and vein (28–33). Brain D3 activity is up-regulated in hyperthyroidism and down-regulated in hypothyroidism. D3 is predominantly present in neuronal cells (34, 35), which are the main cells that express thyroid hormone receptors (36, 37). It has been hypothesized (38, 39) that  $T_4$  is taken up from the blood by glial cells and converted to  $T_3$  in these cells. Subsequently, depending on the type of glial cells in which this has occurred,  $T_3$  would be released from astrocytes to neurons by a paracrine route, whereas the  $T_3$  generated in the tanycytes could be secreted into the cerebrospinal fluid and from there reach neural cells. Once  $T_3$  reaches neurons, it would be available to the thyroid hormone receptors and exert its effects. The D3 expressed in the neurons would limit  $T_3$

bioavailability for receptor binding. In such a model, a close ontogenic regulation of brain D2 and D3 expression seems crucial for providing  $T_3$  to the brain in the amounts needed in different structures at different stages of development.

Different regions of the brain have specific temporal patterns of development, and thus may require a different regulation of  $T_3$  bioavailability. Figure 1 shows the human brain roughly subdivided into different regions. Table 1 summarizes the main function of these regions in the adult brain (40). To study the importance of local control of  $T_3$  synthesis and degradation for human brain development, we determined deiodinase activities (D1, D2, and D3) as well as  $T_3$ ,  $T_4$ , and  $rT_3$  concentrations in the brain regions shown in Fig. 1 at different stages of development.

## Materials and Methods

### Tissue samples

Brains were obtained from 28 fetuses of 13–20 wk PMA at termination of uncomplicated pregnancies for psychosocial reasons. Fetal tissue was collected within 1 h after termination of pregnancy using Misoprostol (Roussel, Uxbridge, UK) vaginal pessaries. Fetal developmental age was carefully estimated solely by one of us (R.H.) based on size, including crown-heel, crown-rump, and heel-toe measurements (41); menstrual history; and ultrasound dating of pregnancy. Normality of fetuses was confirmed by autopsy. Fetal lung organ cultures were routinely established as an indicator of tissue quality. Only tissues from fetuses in which lung airways dilated and the lining epithelium autodifferentiated in culture were used (42). Pregnancies were terminated in accord with the Abortion Act 1967 (United Kingdom) and fetal samples and data handled according to the recommendations of the United Kingdom Government: Review of the guidance on the research use of fetuses and fetal material (Polkinghorne Report) 1989 HMSO. The study was approved by the Multicenter Research Ethics Committee (Edinburgh), the Tayside Committee on Medical Research Ethics, and the Yorkhill Local Research Ethics Committee. In all cases written informed consent was obtained. The fetal brain samples were divided into two PMA age-matched groups, one of which was sent to the Rotterdam laboratory and the other to Madrid.

Brains were also available from nine premature infants who were born at 23–33 wk PMA and died between 24 and 42 wk PMA with

FIG. 1. Cartoon roughly illustrating the different areas from which brain samples were obtained. In fetuses, cortex samples were obtained from the region separating the two hemispheres (medial cortex) and the parietal region (lateral cortex). The CP used in the present study was that of the lateral ventricles. GE samples were no longer available after 28 wk PMA, whereas samples of the H were obtained only from the premature infants. Samples from the MB were obtained up to 20 wk PMA, after which the BG could be identified and dissected out.

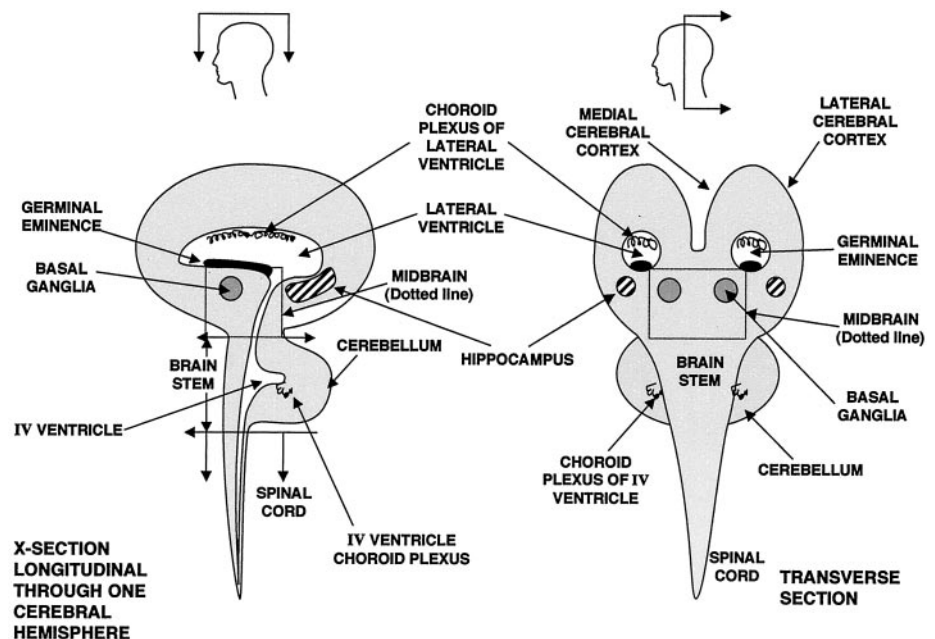

**TABLE 1.** Functions of the different brain regions in adults (40)

| Region | Function                                                                                                                                                                                                                                        |
|--------|-------------------------------------------------------------------------------------------------------------------------------------------------------------------------------------------------------------------------------------------------|
| SC     | Controls movement of the limbs and the trunk; receives and processes sensory information from the skin, joints, and muscles of the limbs and trunk                                                                                              |
| BS     | Receives sensory information from and provides motor output to head, face, neck, and eyes and receives information from special senses as hearing, balance, and taste. In addition, conveys information from the brain to the SC and vice versa |
| MB     | Controls many sensory and motor functions, including eye movement and coordination of visual and auditory reflexes                                                                                                                              |
| Cbl    | Modulates the force and range of movements and is involved in the learning of motor skills                                                                                                                                                      |
| CC     | Is involved in cognitive functions such as language                                                                                                                                                                                             |
| BG     | Participates in regulating motor performance                                                                                                                                                                                                    |
| H      | Is involved in memory storage                                                                                                                                                                                                                   |
| GE     | Fetal brain structure from which cortical interneurons migrate; this brain structure disappears during late fetal brain development                                                                                                             |
| CP     | Secretes cerebral spinal fluid, maintains chemical stability of the central nervous system                                                                                                                                                      |

**TABLE 2.** Medical histories of premature infants

| Cause of death                             | Additional history                                                                                                                                            | Weight (g) | PMA (wk) |       | Survival | Sex |
|--------------------------------------------|---------------------------------------------------------------------------------------------------------------------------------------------------------------|------------|----------|-------|----------|-----|
|                                            |                                                                                                                                                               |            | Birth    | Death |          |     |
| Extreme prematurity                        | Emergency lower uterine segment cesarean section (LUSCS); hepatomegaly with cholestasis, focal myocardial ischemic injury, <i>Candida albicans</i> septicemia | 580        | 23       | 26    | 22 d     | F   |
| Extreme prematurity                        | Normal pregnancy until assisted breech delivery                                                                                                               | 655        | 24       | 24    | 3 min    | M   |
| Extreme prematurity                        | Twin transfusion syndrome; sac with polyhydramnios                                                                                                            | 527        | 24       | 24    | 70 min   | M   |
| Extreme prematurity                        | Twin transfusion syndrome; mild pulmonary hypoplasia; sac with oligohydramnios; twin of baby 3                                                                | 569        | 24       | 24    | 122 min  | M   |
| Extreme prematurity                        | <i>Pseudomonas aeruginosa</i> septicemia, endocarditis, intraventricular hemorrhage                                                                           | 740        | 26       | 27    | 8 d      | F   |
| Extreme prematurity                        | Bronchopneumonia ( <i>P. aeruginosa</i> ); twin of baby 5                                                                                                     | 590        | 26       | 27    | 8 d      | F   |
| Complications of prematurity               | Intraventricular hemorrhage, necrotizing enterocolitis, bronchopulmonary dysplasia, pulmonary hypertension, recurrent sepsis; cerebellar hypoplasia           | 840        | 27       | 42    | 15 wk    | M   |
| Hydrops fetalis (congenital heart anomaly) | Emergency LUSCS at 31 wk; ventilator dependent throughout life                                                                                                | 1970       | 31       | 33    | 15 d     | F   |
| Congenital cardiac anomaly                 | Hyaline membrane disease                                                                                                                                      | 1877       | 33       | 33    | 13 h     | M   |

F, Female; M, male.

postnatal ages of 3 min to 15 wk (Table 2). Parental authorization for postmortem examinations including full organ histology and ancillary investigations was obtained, and examinations were performed by a pediatric pathologist (A.H.). The major postmortem findings and diagnoses are given in Table 2. The samples from each hemisphere of the brains of the premature infants were frozen separately for shipment to the Madrid and Rotterdam laboratories. The tissues were divided and frozen in liquid nitrogen and stored at  $-80^{\circ}\text{C}$  until use.

Different areas from fetal and premature infants' brains were dissected fresh and snap frozen immediately: choroid plexus (CP), medial and lateral cerebral cortex (CC), germinal eminence (GE), cerebellum (Cbl), brain stem (BS), spinal cord (SC), midbrain (MB), basal ganglia (BG), and hippocampus (H), as illustrated in Fig. 1. Exact dissection of the fetal brain areas was done as follows. The fetal brain was exposed by partial removal of the calvaria after incisions were made through the lambdoid, sagittal, and metopic sutures. In the now partially exposed fetal brain, a longitudinal incision was made through the superior aspect of the left CC, and this was extended into the lateral ventricle. The lateral ventricle CP was lifted out, exposing the tissue ridge of the GE, which was removed by careful dissection. The tissue between the ventricular wall and the surface of the CC on the medial and lateral aspects was removed, thereafter called the medial and lateral CC. A similar dissection procedure was carried out on the right cerebral hemisphere and the tissue retained. The remaining cerebral cortical tissue was then removed,

exposing the superior aspect of the MB region. A horizontal incision was made just superior to the upper border of the Cbl to define the superior border of the BS and the inferior aspect of the MB region, which was then dissected free. The fourth ventricle CP was carefully lifted free, and the cerebellar hemispheres dissected from the BS tissue. The inferior border of the BS was defined as the level of the pyramidal decussation. The entire SC was removed by dissection and retained. In all brain regions the pia-arachnoid membrane was removed.

The nine premature brains available for sampling ranged from 23 to 33 wk. At these stages of development, readily identifiable landmarks and anatomical relationships allowed accurate sampling of brain areas of interest. The Cbl and BS were detached from the upper MB by a transverse incision. The brain was subjected to coronal sectioning, with the first incision made at the level of the mamillary bodies, and if these were not readily identified, the incision was made immediately behind the optic chiasma. Serial coronal sections, at intervals of 0.5 cm, were then performed. The coronal sections of brain were then examined to permit accurate orientation for sampling. The medial cortical sample represented a block of cortex lining the interhemispheric sulcus between the cerebral hemispheres. This cortical sample was made to a maximum depth of 1 cm. The lateral cortical sample was of similar depth and was from the parietal cortex. CP was taken from the lateral ventricles. The BG mass was identifiable adjacent to and below the lateral ventricles. The GE was identifiable in the cases between 24 and 27 wk gestation as



a subependymal protuberance over the head of the caudate nucleus on the lateral wall of the lateral ventricle. The H was identified as a gyral structure seen in the coronal section taken immediately posterior to the aqueduct identified in the cut surface of the MB. Cbl, BS, and SC samples were taken from these readily identifiable structures. The BS samples comprise lower pons and medulla.

### Materials

[3'-<sup>125</sup>I]T<sub>3</sub> was obtained from Amersham (Amersham, UK) for the determination of D3; T<sub>4</sub>, T<sub>3</sub>, rT<sub>3</sub>, and 3,3'-T<sub>2</sub> were purchased from Henning Berlin GmbH (Berlin, Germany). High specific activity [3',5'-<sup>131</sup>I]T<sub>4</sub>, [3',5'-<sup>125</sup>I]T<sub>4</sub>, [3'-<sup>125</sup>I]T<sub>3</sub>, and [3',5'-<sup>125</sup>I]rT<sub>3</sub> (~3000 μCi/μg) were prepared by radioiodination of T<sub>3</sub>, 3,5-T<sub>2</sub>, and 3,3'-T<sub>2</sub>, respectively, as previously described (43), and used for the determinations of T<sub>4</sub>, T<sub>3</sub>, and rT<sub>3</sub> concentrations and D2 activities. [3,5-<sup>125</sup>I]T<sub>3</sub> was obtained from Formula GmbH (Berlin, Germany). Dithiothreitol (DTT) and 6-n-propyl-2-thiouracil (PTU) were obtained from Sigma (St. Louis, MO); Sephadex LH-20 from Pharmacia (Woerden, The Netherlands); and Dowex-50W-X2 and AG 1 × 2 resins from Bio-Rad Laboratories (Richmond, CA).

### Determination of T<sub>4</sub>, T<sub>3</sub>, and rT<sub>3</sub> concentrations in human fetal brain

T<sub>4</sub>, T<sub>3</sub>, and rT<sub>3</sub> were determined by highly sensitive and specific RIAs after extensive extraction and purification of the iodothyronines from tissues, as described elsewhere (43, 44). In brief, the sample was homogenized directly in methanol, and [<sup>131</sup>I]T<sub>4</sub> and [<sup>125</sup>I]T<sub>3</sub> were added to each sample as internal tracers for recovery calculations. These tracers were added in amounts small enough to avoid interferences in the final RIAs. Appropriate volumes of chloroform were added to extract with chloroform/methanol (2:1), twice. The iodothyronines were then back-extracted into an aqueous phase and purified by passing this aqueous phase through Bio-Rad AG 1 × 2 resin columns. After a pH gradient, the iodothyronines were eluted with 70% acetic acid, which was then evaporated to dryness and the residue dissolved in RIA buffer. Each extract was extensively counted to determine the recovery of the [<sup>131</sup>I]T<sub>4</sub> and [<sup>125</sup>I]T<sub>3</sub> added to each sample during the initial homogenization process. Average recovery was 50–60% for [<sup>131</sup>I]T<sub>4</sub> and 60–70% for [<sup>125</sup>I]T<sub>3</sub>. T<sub>4</sub> and T<sub>3</sub> contents were determined by RIAs in triplicate at two dilutions. For the determination of rT<sub>3</sub>, we used the same procedure as for T<sub>4</sub> and T<sub>3</sub> but using [<sup>125</sup>I]rT<sub>3</sub> as recovery tracer. The limits of detection are 3.3 fmol T<sub>4</sub>, 1.1 fmol T<sub>3</sub>, and 1.5 fmol rT<sub>3</sub>/tube. The molar cross-reactivities for the RIAs and the inter- and intraassay variations (<10%) have been previously described (10, 14, 45, 46). Concentrations were then calculated using the amounts of T<sub>4</sub> and T<sub>3</sub> found in the respective RIAs, the individual recovery of the [<sup>131</sup>I]T<sub>4</sub> and [<sup>125</sup>I]T<sub>3</sub> added to each sample during the initial homogenization process, and the weight of the tissue sample submitted to extraction. The results are given throughout in picomoles per gram wet weight.

No corrections for the amounts iodothyronines contributed by the blood trapped in the tissue aliquot could be carried out due to lack of blood or serum from the fetuses or premature infants studied.

### Determination of D1 and D3 activity

Tissues were homogenized on ice in 5 volumes 0.1 M phosphate (pH 7.2), 2 mM EDTA, containing 1 mM DTT, using a Polytron (Kinematica, Lucerne, Switzerland). The tissue homogenates were stored at –80 C until further analysis. Protein concentrations were determined using the method of Bradford (47), using BSA as standard.

D1 activities were determined by incubation of 0.1 μM [<sup>125</sup>I]rT<sub>3</sub> (100,000 cpm) for 60 min at 37 C with 1 mg protein/ml tissue homogenate in the presence or absence of 0.1 mM PTU in 0.1 ml 0.1 M phosphate (pH 7.2), 2 mM EDTA, 10 mM DTT. Reactions were stopped by the addition of 0.1 ml 5% BSA. Protein-bound [<sup>125</sup>I]iodothyronines were precipitated by addition of 0.5 ml 10% trichloroacetic acid. After centrifugation, the supernatants were analyzed for <sup>125</sup>I<sup>–</sup> production on Sephadex LH-20 minicolumns (bed volume 0.25 ml), equilibrated, and eluted with 0.1 M HCl.

D3 activities were measured in the Rotterdam laboratory by incubation of 1 nM [<sup>125</sup>I]T<sub>3</sub> (200,000 cpm) for 60 min at 37 C with 0.05 or 1 mg protein/ml tissue homogenate in 0.1 ml 0.1 M phosphate buffer (pH

7.2), 2 mM EDTA, and 50 mM DTT. Reactions were stopped by the addition of 0.1 ml ice-cold methanol. After centrifugation, 0.15 ml supernatant was mixed with 0.1 ml 0.02 M ammonium acetate (pH 4.0), and 0.1 ml of the mixture was applied to a 4.6 × 250 mm Symmetry C18 column connected to an Alliance HPLC system (Waters, Etten-Leur, The Netherlands), and eluted with a gradient of acetonitrile in 0.02 M ammonium acetate (pH 4.0) at a flow of 1.2 ml/min. The proportion of acetonitrile was increased linearly from 30 to 44% in 10 min. The radioactivity in the eluate was determined using a Radiomatic A-500 flow scintillation detector (Packard, Meriden, CT). D3 activities are expressed in femtomoles per minute per milligram protein.

D3 activities in a smaller number of samples were also determined in the Madrid laboratory by measuring the iodide released after incubation of tissue homogenates with 40,000 cpm of inner-ring labeled [3,5-<sup>125</sup>I]T<sub>3</sub> (80 μCi/μg) at 37 C during 1 h. Assay final conditions were 25 nM T<sub>3</sub>, 20 mM DTT, 1 mM PTU (pH 7.5), and 40–50 μg protein in a total volume of 100 μl. [<sup>125</sup>I]iodide was separated from the rest of the reaction products using Dowex 50W X2 columns as described (48). The amount of iodide in the blanks was routinely less than 0.5% of the total radioactivity. Detection limits were 1.2–1.7 fmol/min·mg protein.

### Determination of D2 activity

Brain samples were homogenized in buffer [0.32 M sucrose, 10 mM HEPES, and 10 mM DTT (pH 7.0)]. Before each assay [<sup>125</sup>I]T<sub>4</sub> was purified by paper electrophoresis from contaminating iodide. D2 activity was assayed as previously described (49), incubating 80–100 μg protein with 80,000 cpm of [<sup>125</sup>I]T<sub>4</sub>, 2 nM T<sub>4</sub>, 1 μM T<sub>3</sub>, 20 mM DTT, and 1 mM PTU for 1 h at 37 C. The total volume was 100 μl. The <sup>125</sup>Iodide released was separated by ion-exchange chromatography on Dowex-50W-X2 columns equilibrated in 10% acetic acid. The amount of iodide in the blanks was routinely less than 1% of the total radioactivity. Results were expressed in femtomoles per hour per milligram protein. Detection limits were 2–5 fmol/h·mg protein.

### Statistical analysis

Unless data points are shown individually, results are given as means ± SE. These values, significance of differences between means (Student's *t* test), and Pearson's correlation coefficients, bivariate or partial (correcting for PMA), were calculated using the SPSS statistical package (SPSS Inc., Chicago, IL). *P* ≤ 0.05 was considered significant. The regression coefficients *r* and *P* values shown in some panels of the figures (see Figs. 2, 3, 4, and 6) were calculated with the SPSS statistical package for curve estimation regression analysis, which evaluates the degree of fitting of the different variables (iodothyronine concentrations, T<sub>3</sub>/T<sub>4</sub> ratios, D2 activities, etc.) as different functions of PMA. Eleven different functions were tested (linear, logarithmic, inverse, quadratic, cubic, power, compound, logistic, growth, exponential, S mode). Only when *P* ≤ 0.05, the regression coefficients from the curve estimation analysis are shown in the corresponding panels, the type of function being indicated in the figure legend. Curves through data points shown in the same panels were obtained using the options provided by CA-Cricket Graph III for Macintosh (Computer Associates International, Inc., Plaza Islandia, NY) for the type of function disclosed by the curve estimation regression analysis.

## Results

Figure 2 shows the changes with increasing PMA of the concentrations of T<sub>4</sub>, T<sub>3</sub>, and rT<sub>3</sub> in different regions of the brain between 13 and 20 wk PMA. There were no statistically significant differences in the iodothyronine concentrations between medial *vs.* lateral cortex, and data were pooled as CC. Major differences are seen between some of the patterns corresponding to different brain areas. Thus, the T<sub>4</sub> concentrations were fitted to a quadratic function of PMA in the cortex, GE, and CP, with positive values of the coefficient *r*. The changes in T<sub>4</sub> *vs.* PMA in the Cbl also fitted a quadratic function of PMA, but it was a distinctly different one, considering the regression coefficient *r* is negative. The concen-

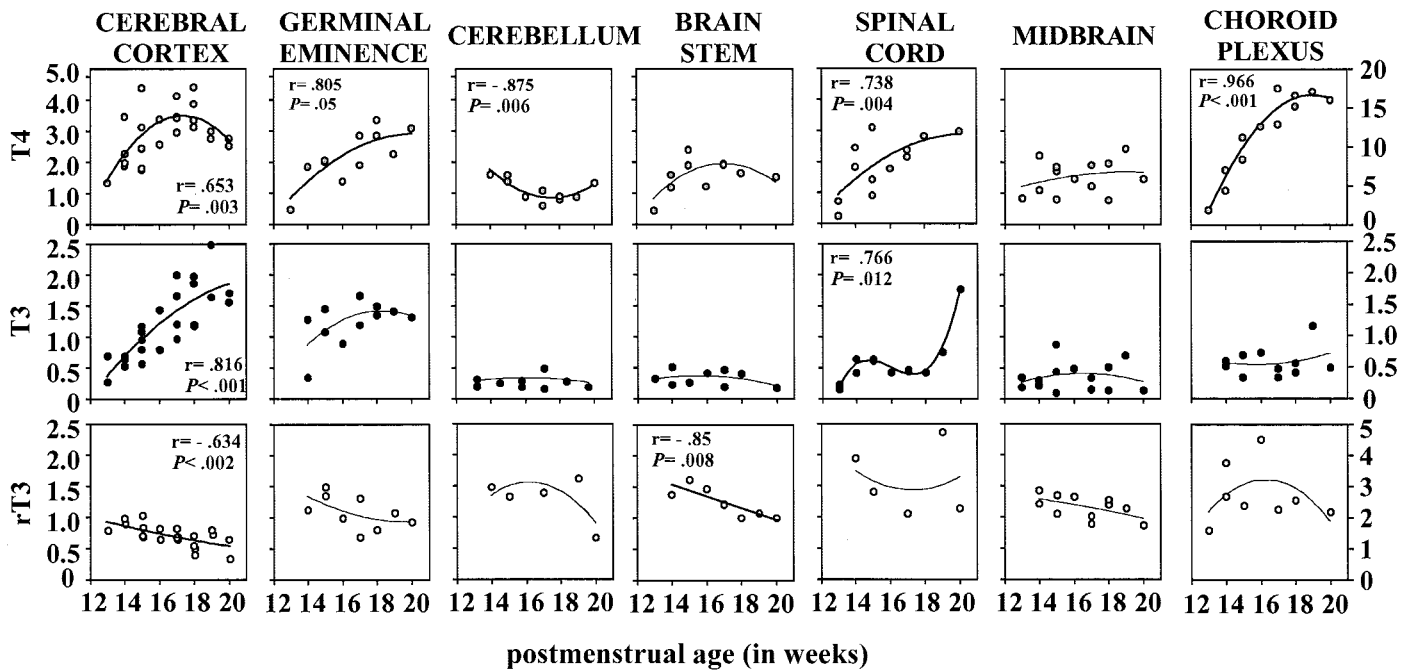

FIG. 2. Ontogenic changes of the concentrations of  $T_4$ ,  $T_3$ , and  $rT_3$  (in picomoles per gram wet weight), up to 20 wk PMA. To convert values for  $T_4$  to nanograms per gram, divide by 1.287; to convert values for  $T_3$  and  $rT_3$  to nanograms per gram, divide by 1.54. The ordinate scales shown on the left axis are the same for all areas, with the exception of the CP, for which they are shown on the right-hand axis. In this and further figures, the regression coefficients  $r$  and the  $P$  values shown in the panels are those corresponding to the functions calculated by curve estimation regression analysis (as outlined in *Materials and Methods*). No  $r$  values are shown if  $P > 0.05$ .  $T_4$  concentrations were fitted to a quadratic function of PMA in the cortex, GE, SC, CP, and Cbl, with positive regression coefficients. In contrast, it is negative for the Cbl. The concentrations of  $T_3$  in the cortex and SC increased significantly with PMA, following a quadratic function but not in other areas, including the CP, despite the striking increase of the concentrations of  $T_4$  in the latter area. The concentrations of  $rT_3$  decreased linearly in the cortex and BS with increasing PMA.

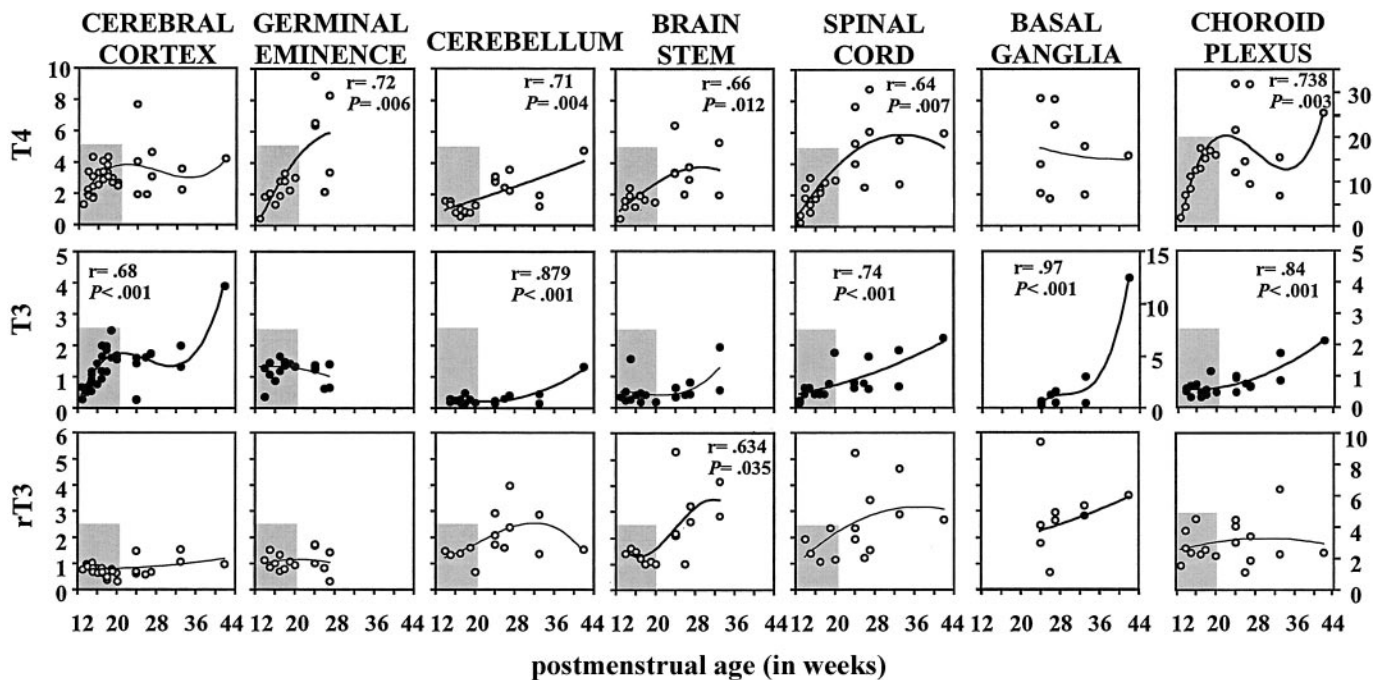

FIG. 3. Concentrations of  $T_4$ ,  $T_3$ , and  $rT_3$  (in picomoles per gram wet weight) in different areas of the brain of premature infants, as a function of their PMA at death (see Table 2), shown in continuation of data points (within the shaded insets) that correspond to the fetal samples of Fig. 2. To convert values for  $T_4$  to nanograms per gram, divide by 1.287; to convert values for  $T_3$  and  $rT_3$  to nanograms per gram, divide by 1.54. For the meaning of the  $r$  and  $P$  values, see the legend to Fig. 2. They correspond to quadratic functions of PMA in all panels where  $r$  and  $P$  values are shown, except for CP  $T_4$ , CC, and BG  $T_3$ , and BS  $rT_3$ , which were cubic functions of PMA.

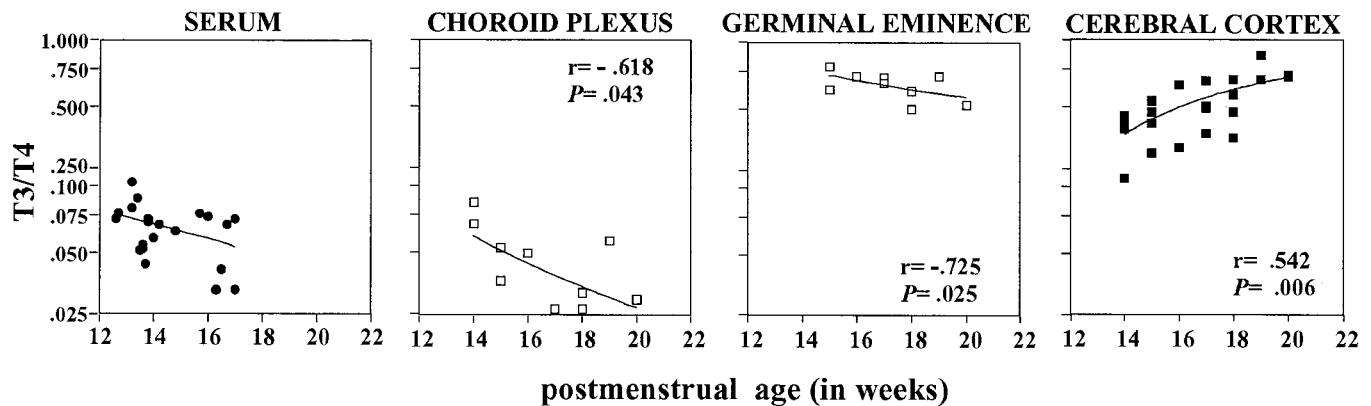

FIG. 4. Comparison of the changes in  $T_3$  to  $T_4$  ratios in fetal serum, CP, GE, and cortex, as linear functions of PMA. The serum  $T_3/T_4$  ratio tended to decrease as a linear function of PMA but did not reach statistical significance ( $r = -0.403$ ;  $P = 0.070$ ). The ratios are plotted on a logarithmic scale to emphasize the differences among these three brain areas and between them and the serum. The functions fitting the CC data were distinctly different from the others because there was no overlap between the 95% confidence intervals of its positive regression coefficient and the negative ones of the other two areas. These coefficients did overlap when the CP and GE were compared.

tration of  $T_3$  in the cortex and SC increased significantly with PMA, following quadratic functions, but not in the other areas, including the CP, despite the striking increase of the concentrations of  $T_4$  in this area. The concentrations of  $rT_3$  decreased linearly in the cortex and BS and tended to decrease in the GE and MB (not statistically significant).

The observed changes during this intrauterine period represent ontogenic profiles because the fetuses and their mothers were presumably normal. This may not be so for the data obtained from the brains of the premature infants because the illnesses suffered and the different causes of their death might affect the observed profiles. For this reason they are shown separately in Fig. 3 as a continuation of the data of the fetuses, and are referred to the PMA at death, to follow the same criterion as used for Fig. 2.

It appears that  $T_4$  concentrations continue to increase in most areas, following quadratic or cubic functions of PMA (Fig. 3).  $T_3$  concentrations also start increasing in areas in which they hardly changed before 20 wk PMA or in which they had actually been decreasing in fetuses (Cbl). The concentrations of  $rT_3$  increase in the BS, in which they had been decreasing before 20 wk PMA, with no well-defined patterns of change being found in the remaining areas. In the H (not shown in Fig. 3), obtained only from the premature infants, no correlations were found with PMA at death, mean values being  $3.54 \pm 0.49$  pmol  $T_4$ /g ( $2.75 \pm 0.38$  ng  $T_4$ /g,  $n = 9$ ),  $1.35 \pm 0.50$  pmol  $T_3$ /g ( $0.879 \pm 0.33$  ng  $T_3$ /g,  $n = 9$ ), and  $1.98 \pm 0.57$  pmol  $rT_3$ /g ( $1.289 \pm 0.37$  ng  $rT_3$ /g,  $n = 9$ ). When data from all brain areas obtained between 13 and 42 wk PMA are considered as a whole, positive correlations were found *vs.* age for the three iodothyronines, with  $P < 0.003$  for  $T_4$  and  $P < 0.001$  for  $T_3$  and  $rT_3$ . Considering the data of the fetuses alone, the positive correlation for  $rT_3$  was lost. When the premature babies alone were considered, only the positive correlation for  $T_3$  persisted ( $P < 0.001$ ).

Tissue iodothyronine levels depend on not only local iodothyronine deiodinase activities but also, among others, on the supply of thyroid hormone, in particular  $T_4$ , from the circulation. As a means to correct for changes in  $T_4$  supply, the  $T_3/T_4$ ,  $rT_3/T_4$ , and  $rT_3/T_3$  ratios were calculated and plotted against PMA. Some correlations between the ratios

and PMA were found. Thus, for instance, the  $T_3/T_4$  ratio increased throughout the study period in the CC ( $r = 0.482$ ;  $P = 0.005$ ), whereas it tended to decrease in the GE ( $r = -0.473$ ;  $P = 0.053$ ). The  $rT_3/T_4$  ratio decreased in the CC, but only in fetuses ( $r = -0.721$ ;  $P < 0.001$ ), and increased in the same area in premature infants ( $r = 0.669$ ;  $P = 0.049$ ). It decreased throughout the study period in the GE ( $r = -0.807$ ;  $P < 0.001$ ) and CP ( $r = -0.485$ ;  $P = 0.048$ ). The  $rT_3/T_3$  ratios showed changes similar to those of the  $rT_3/T_4$  ratios in the CC of the fetuses ( $r = -0.861$ ;  $P < 0.001$ ) and also decreased in the CP ( $r = -0.804$ ;  $P < 0.001$ ) throughout the study period and in the BG of the premature infants ( $r = -0.620$ ;  $P = 0.024$ ). The changes with PMA of these ratios in the human developing brain and of the concentrations of the iodothyronines shown in Figs. 2 and 3 clearly suggest that patterns are both area and age specific.

Therefore, they cannot be predicted from the circulating levels of the iodothyronines at different stages of development. This point is illustrated in Fig. 4, in which the  $T_3/T_4$  ratios in the CP, GE, and CC up to 20 wk PMA are compared with those obtained in sera from developing fetuses. The latter are taken from a previous study (14), in which the same analytical procedures had been used as for the present brain areas, thus permitting the determination of the very low concentrations of  $T_3$  in fetal serum. The  $T_3/T_4$  ratios in serum tended to decrease with PMA, but the regression coefficient did not reach statistical significance. In the GE and CP, the  $T_3/T_4$  ratios decrease linearly with PMA. In contrast, the  $T_3/T_4$  ratio in the CC increased with PMA.

In addition to the iodothyronine levels, deiodinase activities were determined in the human developing brain samples. No detectable D1 activity was found in any brain sample (data not shown). D2 and D3 activities were determined in the Cbl, BS, SC, CP, and CC from both fetal and premature infants' samples (13–42 wk PMA), MB and GE from fetal samples (13–20 wk PMA), and BG and H from premature infants (23–42 wk PMA at death). Average D2 and D3 activities for the different brain regions are shown in Fig. 5 for fetuses and premature infants separately. D3 activity was highest in Cbl, but considerable D3 activities were also found in MB, BG, BS, SC, and H, whereas D3 activity was low in the



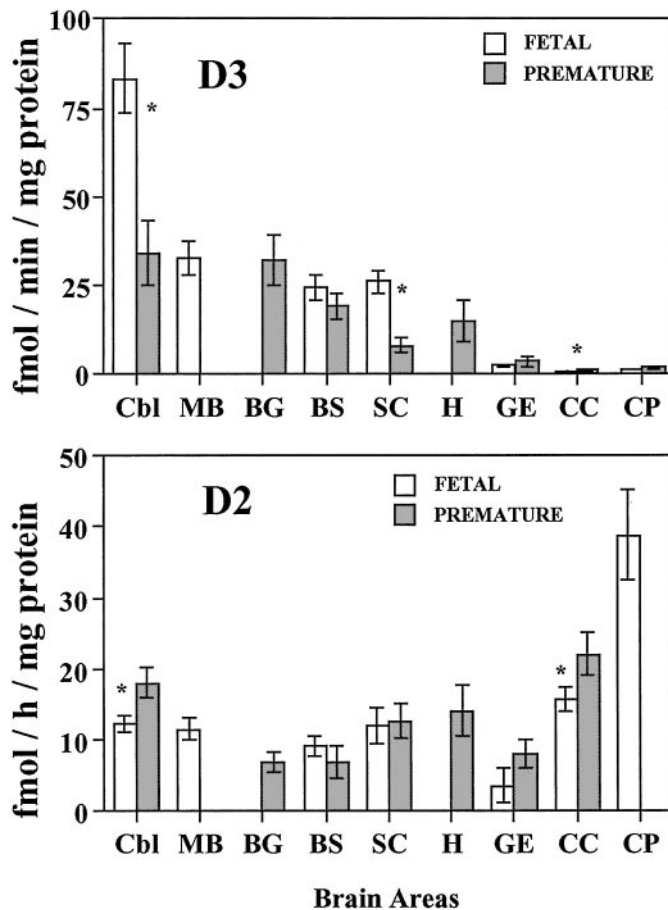

FIG. 5. Average D3 and D2 activities of the different brain regions. Results are the means  $\pm$  SE of samples from fetuses (13–20 wk PMA) and premature infants at death (Table 2). Asterisks identify statistically significant differences between the mean values for fetuses *vs.* premature infants. D3 activities decreased from Cbl to CP and CC (Cbl > MB = BS = SC > GE = CC = CP for fetuses; Cbl = BG > BS = H = SC > GE = CP = CC for premature infants). D2 activities were highest in CP, followed by CC (CP > CC = Cbl = SC = MB > BS = GE for fetuses; CC = Cbl > H = SC = GE = BS = BG for premature infants). The > sign indicates a statistically significant difference between areas, whereas the = sign indicates that the differences were not statistically significant.

GE, CP, and CC. In some fetal samples, D3 activities were higher than in those of the same region obtained from the premature infants. D2 activities were highest in CP and CC, in which D3 activities were the lowest. Most D2 activities ranged between 8 and 20 fmol/h·mg protein. Although such values are about 100 times lower than the D3 activities, they are similar to, or higher than, those found in normal brain tissue from adults (18).

Figure 6 shows the D2 activities in different brain areas, plotted against PMA. D2 activity was detected in all regions and increased with PMA in the CC and Cbl ( $P < 0.05$ ). After controlling for PMA and using all data from all regions throughout the fetal period as a whole, D2 activities were found to correlate positively with the concentrations of  $T_4$  ( $r = 0.65$ ,  $P < 0.001$ ) and  $rT_3$  ( $r = 0.42$ ,  $P = 0.001$ ) and negatively with the  $T_3/T_4$  ratios in the CC ( $r = -0.29$ ,  $P = 0.008$ ). Except for the correlation between D2 activities and

$T_4$  concentrations, the statistical significance disappeared when the data from the premature infants were included.

As shown in Fig. 7, D3 activities decreased with PMA in Cbl, BS, and SC ( $P < 0.05$ ). At all stages, highest D3 activities were found in the Cbl. D3 activities were low throughout the study period in GE, CP, and CC.

Table 3 shows the correlations between the average D3 activities and the iodothyronine levels and ratios in the different brain regions. Figure 8A shows the correlation between the average D3 activities and the  $rT_3/T_3$  and  $rT_3/T_4$  ratios.  $T_4$  levels tended to decrease and  $rT_3$  levels tended to increase with D3 activity. A significant negative correlation was found between D3 activity and the  $T_3$  level ( $r = -0.682$ ). D3 activities were positively correlated with the  $rT_3/T_3$  ratio ( $r = 0.812$ ,  $P = 0.008$ ) and the  $rT_3/T_4$  ratio ( $r = 0.889$ ,  $P = 0.001$ ). Figure 8B depicts the average D3 activities and  $rT_3/T_3$  and  $rT_3/T_4$  ratios in the different brain regions. Except for the CP, the  $rT_3/T_3$  and  $rT_3/T_4$  ratios correlated positively with increasing D3 activities.

The D3 activities shown in Figs. 5, 7, and 8 and in Table 3 were measured in the Rotterdam laboratory. The fewer determinations performed in the Madrid laboratory with a different methodology fully supported these findings, including the different correlations that have been described here.

## Discussion

Studies using the rat as an animal model have shown that fetal and neonatal hypothyroidism lead to multiple structural, functional, and biochemical alterations of brain development (see reviews in Refs. 38, 50, 51). These studies, together with clinical evidence for the effects of maternal hypothyroxinemia on brain development (for review see Ref. 1), indicate the importance of a tightly regulated thyroid hormone bioavailability during brain development. Iodothyronine deiodination contributes to this regulation. In this study we determined local iodothyronine levels and deiodinase activities in different brain regions at different stages of development to evaluate the possible contribution of the different deiodinases in controlling local  $T_3$  availability in the human developing brain.

As already pointed out previously, it is quite likely that the changes in the concentrations of  $T_4$ ,  $T_3$ , and  $rT_3$  observed with the samples of the fetuses from normal mothers reflect the true ontogenetic profile for different areas of the human brain. They are quite different for the different areas studied and cannot be predicted from the changes found in the fetal circulation. Obviously we cannot exclude that there are also differences within each area related to cellular heterogeneity and different timing of maturational events in each structure, but this point cannot yet be adequately resolved with the sensitivity of presently available techniques. A similar comment might also be pertinent for the D2 and D3 activities here reported.

The changes found in some areas before midgestation appear to merit closer attention. The highest  $T_4$  and  $rT_3$  concentrations were observed in the choroid plexus.  $T_4$  increased significantly with PMA, despite little change in the low  $T_3$  concentrations; indeed, the  $T_3/T_4$  and  $rT_3/T_4$  ratios

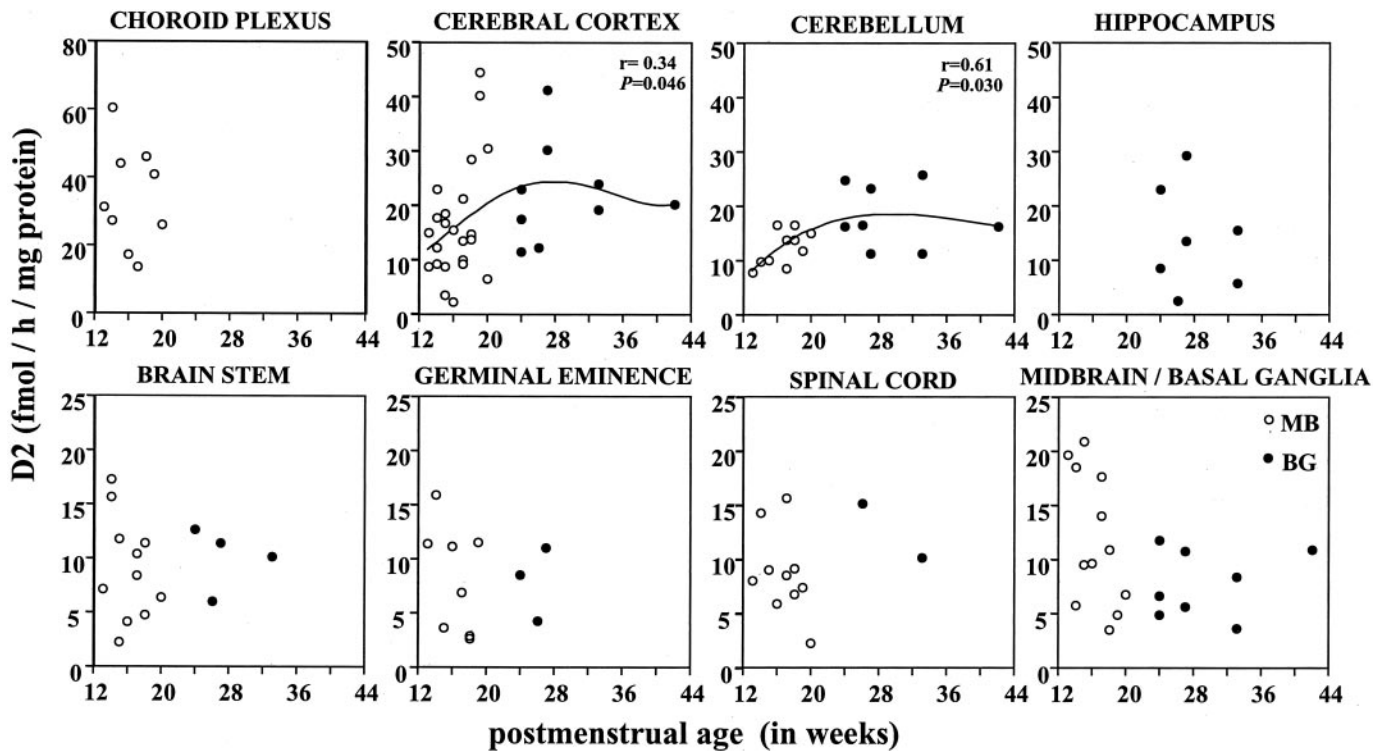

FIG. 6. D2 activities in samples from fetuses (○) and premature infants (●) as a function of PMA from CP, CC, Cbl, H, BS, GE, SC, MB, and BG. For the meaning of  $r$  and  $P$  values, see the legend to Fig. 2. D2 activities changed with increasing PMA, the CC and Cbl following cubic functions of PMA, but no well-defined patterns were found in the remaining areas.

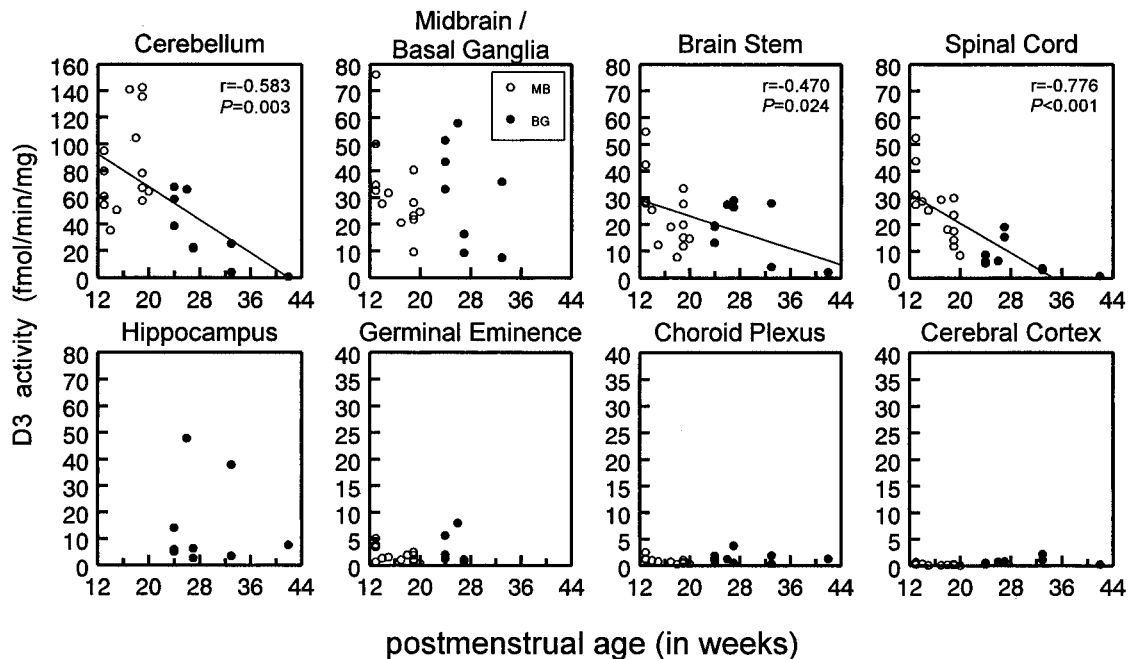

FIG. 7. D3 activities in fetuses (○) and premature infants (●) as a function of PMA from Cbl, MB, BG, BS, SC, H, GE, CP, and CC as a function of PMA. The  $r$  values show Pearson's correlation coefficient with PMA.

were decreasing with PMA. The lack of increase in the concentration of  $T_3$  is also rather striking when we consider that the D2 activities were among the highest. This could not be attributed to high D3 activities because these were very low. However, it should be realized that the deiodination rates

measured under *in vitro* conditions may not represent deiodination taking place *in vivo*. It is possible that only a small proportion of the total  $T_4$  we have measured in the choroid plexus samples is actually available intracellularly for deiodination by D2 and D3: most of it is likely to be bound by



transthyretin, which is already synthesized in the human CP long before 13 wk PMA (52). Despite the fact that transport of  $T_4$  from the plasma to the brain is normal in transthyretin-null mice (53), the CP is considered to be important for the transport of  $T_4$  into the brain. The transthyretin that is synthesized in the CP epithelial cells would either transfer  $T_4$  from the epithelial cells to the cerebrospinal fluid or facilitate its passage after the transthyretin is excreted into the cerebrospinal fluid (54). The amounts of substrate iodothyronines actually reaching D2 and D3 deiodination sites may well be much lower than expected from the total concentrations.

**TABLE 3.** Correlation of D3 activity with iodothyronine levels and ratios in different brain regions from fetuses and premature infants

|          | Iodothyronine levels |        |        | Iodothyronine ratios |            |           |
|----------|----------------------|--------|--------|----------------------|------------|-----------|
|          | $rT_3$               | $T_4$  | $T_3$  | $rT_3/T_4$           | $rT_3/T_3$ | $T_3/T_4$ |
| <i>r</i> | 0.138                | -0.454 | -0.682 | 0.889                | 0.812      | -0.236    |
| <i>P</i> | 0.723                | 0.219  | 0.043  | 0.001                | 0.008      | 0.539     |

Pearson's correlation coefficient *r* and *P* values were calculated using SPSS.

It is therefore likely that in this unique and morphologically heterogeneous structure mechanisms other than deiodination, such as thyroid hormone transport, are more important for the regulation of intracellular thyroid hormone levels.

The largest increase in  $T_3$  concentration up to midgestation was observed in the CC, which appeared to continue even when the  $T_4$  concentrations were no longer increasing. As a result, the cortex  $T_3/T_4$  ratio increased throughout this period, in contrast to the serum  $T_3/T_4$  ratio, which tended to decrease. On the contrary,  $rT_3$  concentrations and  $rT_3/T_4$  ratios were decreasing during the same developmental period. Thus, both the changes in  $T_3$  and  $rT_3$  concentrations were consistent with the findings that D2 activities were clearly detectable by 13 wk PMA, and D3 activities were the lowest found in the present study. We cannot exclude that other regulatory mechanisms are also involved in determining the concentration of  $T_3$  in the CC. The changes described here for the CC up to midgestation are consistent with previous findings by others (8, 16, 17), showing that both  $T_3$  and thyroid hormone receptor concentrations are increasing in the human brain between 8 and 18 wk PMA: at 13 wk ges-

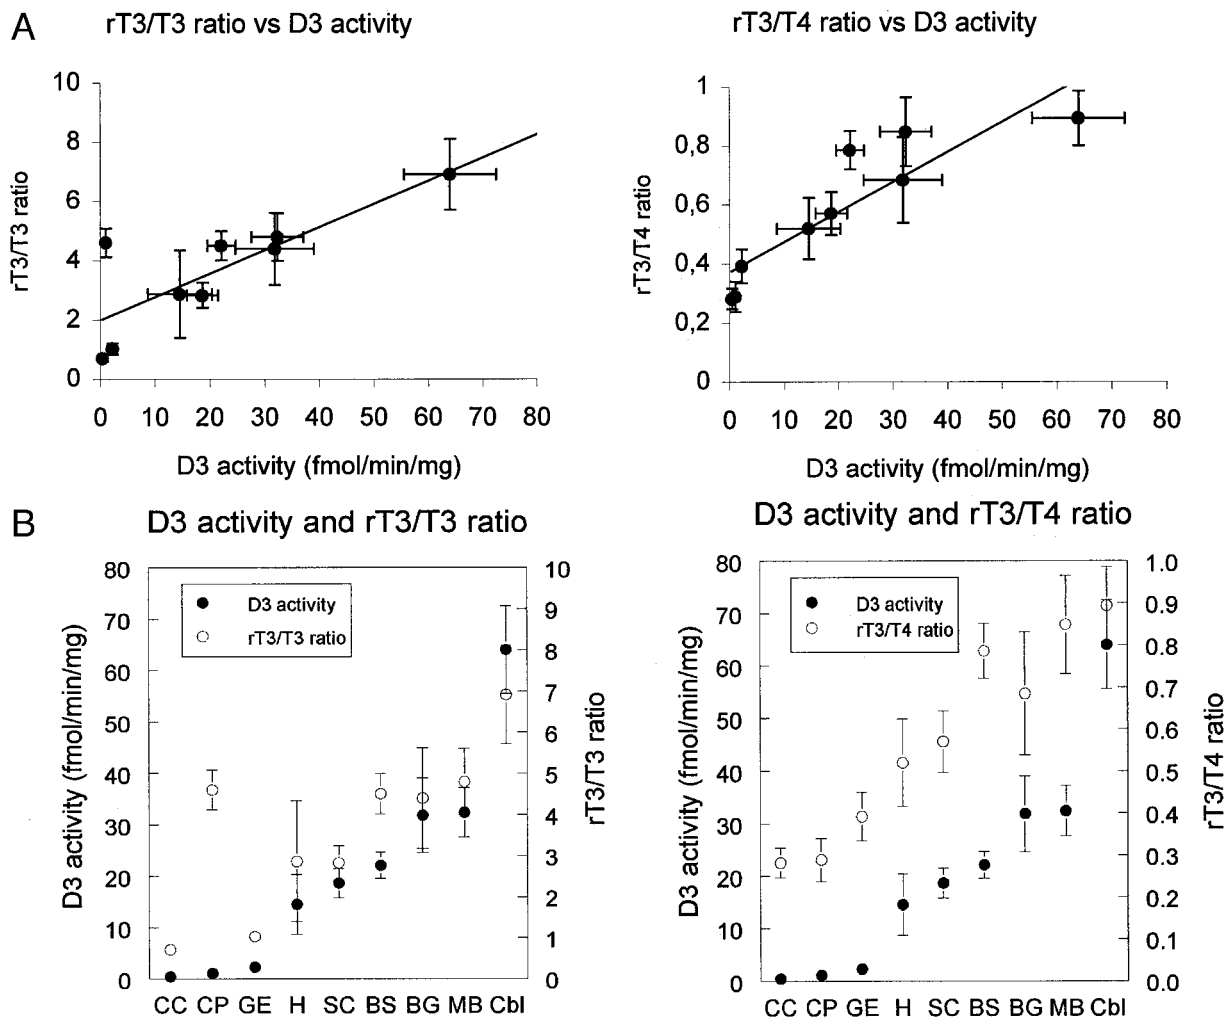

**FIG. 8.** Average  $rT_3/T_3$  and  $rT_3/T_4$  ratios as a function of D3 activities (A) and average D3 activities and  $rT_3/T_3$  and  $rT_3/T_4$  ratios in the different brain regions (B). Results are the means per brain region  $\pm$  SE. The *r* value indicates the Pearson's correlation between D3 activity and the iodothyronine ratio (B).

tation  $T_3$  concentrations in the cortex had already reached 60% of adult values. D2 and D3 activities have also been previously reported in the human CC by 11–14 wk PMA (55). We point out that the present  $T_3$  concentrations in the human CC are comparable with those reported in adults: 1.5–2.2 pmol  $T_3$ /g (1.0–1.4 ng  $T_3$ /g) (18, 56). The fetal D2 activities are actually much higher than reported in the adult cortex (~8 fmol/h·mg protein) (18). The ontogenic changes of  $T_4$ ,  $T_3$ , and D2 observed in the present study are in conceptual agreement with those reported for the rat brain (46, 49); between 18 and 22 d of gestation, there is a 4-fold increase in D2 activity, a 10-fold increase in  $T_4$  concentrations, and an 18-fold increase in  $T_3$  concentrations in rat CC.

The present results also indirectly support the hypothesis that  $T_3$  is relevant for the development of the human CC from very early in gestation, possibly soon after completion of morphogenesis of the pros-encephalon (57). Although this hypothesis is supported by epidemiological and clinical findings (1), no direct proof is available for man. It has, however, been directly confirmed (58) in the rat for a developmental period corresponding to that occurring in man before mid-gestation. The tendency of  $T_3$  concentrations to increase in the GE before midgestation suggests that this structure might already be thyroid hormone sensitive, but we are unaware of any studies regarding abnormalities in this structure related to thyroid hormone insufficiency.

The ontogenic changes in the developing human Cbl contrast with those described for the CC. The concentrations of  $T_4$  and  $T_3$  remained low, and especially  $T_3$  was maintained at levels that were appreciably lower than those found during the same period in other areas, such as the cortex, GE, SC, and even CP. D2 activities were similar to those found in the cortex, but D3 activities were the highest found in any of the brain areas studied during this developmental period and are likely to be a very important factor in the maintenance of the low cerebellar  $T_3$  concentrations. So are the high D3 activities found in MB, BS, and SC, all areas in which  $T_3$  concentrations were low during most of the developmental period up to midgestation.

Some caution should be applied to the interpretation of data obtained in the postnatal brain samples, insofar as it is not excluded that they may to some extent be influenced by nonthyroidal illness, which is known to affect peripheral thyroid hormone metabolism (59, 60).

The present results confirm for the human developing brain the same principles that appear to modulate  $T_3$  bioavailability in different developing structures, and in different species, in a temporally and spatially specific sequence of events, namely by the ontogenetically programmed expression of the iodothyronine deiodinase isoenzymes, mainly D2 and D3 (29, 61, 62). D1 activity was not detected in any brain area. This is in agreement with previous studies of Campos-Barros *et al.* (63), who found D2 and D3 activity, but no D1 activity, in adult human brain. We have already discussed the D2 activities found in different areas, compared with those in adults. The activities of D3 during early development that we report here for different brain areas show very high levels in specific structures that, in general, tend to decrease with PMA. The highest D3 activities were found in Cbl and were higher than in the adult brain (64). The spatial distribution

of D3, however, differs: in the adult brain, D3 activity is low in Cbl, MB, and BS, whereas higher levels are found in the H and CC (Visser, T. J., E. Kaptein, and E. Fliers, unpublished data, and Ref. 64). Santini *et al.* (64) found that  $T_3$  levels are also negatively correlated with D3 activity in the adult brain, as described here for the developing human brain.

The D3 activities found here for the brain are only 2-fold lower than those reported in human placenta (31). D3 expression in the placenta is believed to protect the fetus from excessive maternal  $T_3$  (12, 15, 28). Thyroid hormone induces neuronal differentiation such as dendritic and axonal growth, neuronal migration, and myelination (38). Strict regulation of thyroid hormone bioavailability is critical because neuronal development is affected in the hypothyroid and hyperthyroid brain. The high D3 activities we found in the brain, which tended to decrease with age, suggest that local D3 is important to limit  $T_3$  in the various brain regions during critical stages of development. It is unclear whether D3 has an additional physiological role in the production of  $rT_3$  and  $3,3'$ - $T_2$ . Because  $rT_3$ , but not  $T_3$ , has profound and acute effects on the cytoskeleton in brain cells (65), it is not excluded that  $rT_3$  also has a function in brain development.  $3,3'$ - $T_2$  has been shown to increase the basal metabolic rate in adult rat. This effect may be mediated by direct mitochondrial binding (66).

D2 and D3 are expressed in distinct cell types: D2 in astrocytes and tanocytes and D3 in neurons. The hypothesis has been put forward (38) that astrocytes and tanocytes take up  $T_4$  from the circulation and convert it to  $T_3$ , which is delivered to neurons (that contain most of the nuclear receptors), in which D3 would limit  $T_3$  availability according to the local temporal needs for thyroid hormone action. In addition, although still poorly studied, metabolic pathways other than deiodination, such as sulfation, may play regulatory roles in the developing brain.

A large number of cerebellar genes are regulated by thyroid hormone (38). Although not much is known on the molecular basis for the specific timing of action on gene expression, it is known that the different regions of the brain have specific temporal patterns of development and thus require different regulation of  $T_3$  bioavailability. In general, roughly, the cerebral cortex starts to develop in the second month of pregnancy, whereas major events in cerebellar development do not occur until wk 34 (51). In agreement with this, we found low D3 activity in the CC, which would require  $T_3$  for differentiation early in development and high D3 activity in the later developing Cbl.

In this study, we also compared the average D3 activities with the average thyroid hormone levels and ratios in the different brain regions. Except for the CP, we observed that D3 activity was high in the regions with low  $T_3$  and  $T_4$  and high  $rT_3$  levels and low in regions with high  $T_3$  and  $T_4$  and low  $rT_3$  levels. We found a significant negative correlation between D3 activities and  $T_3$  levels and significant positive correlations between D3 activity and the ratio of  $rT_3/T_3$  and the ratio of  $rT_3/T_4$ . Because D3 catalyzes the degradation of  $T_3$  and  $T_4$  and the production of  $rT_3$ , our results suggest that D3 is also important in humans for the regulation of the intracellular thyroid hormone levels in the different brain regions. Furthermore, no D1 activity was found in any brain

region. In addition to the presence of D3 activity, the absence of D1 activity may contribute to the high tissue  $rT_3$  levels.

In conclusion, by determining and correlating the ontogenic patterns of deiodinase activities and thyroid hormone levels in the human brain, we have shown that both D3- and D2-catalyzed deiodination are important pathways for the intracellular regulation of thyroid hormone in the different regions of the developing human brain, this regulation being region and time specific. Although D3 is expressed to a greater extent than D2, the latter is clearly important in thyroid hormone activation at the cellular level. Further *in situ* hybridization and immunohistochemistry studies are required to confirm the hypothesis that a close regulation of D2 and D3 activities is crucial for tailoring  $T_3$  bioavailability to changing needs of human developing brain structures.

### Acknowledgments

We thank Asha S. P. D. Mangnoesing for her assistance with the D3 activity determinations and Socorro Duran, Maria Jesus Presas, and Rosalia Lavado-Autric for the determinations of the iodothyronine concentrations. We are grateful to Professor Juan José de la Cruz (Faculty of Medicine, Madrid) for invaluable help with issues of statistics.

Received October 22, 2003. Accepted March 28, 2004.

Address all correspondence and requests for reprints to: Theo J. Visser, Department of Internal Medicine, Erasmus Medical Center, Room Ee 502, Dr Molewaterplein 50, 3015 GE Rotterdam, The Netherlands. E-mail: t.j.visser@erasmusmc.nl.

This work was supported by European Community Grant QL6-2000-00930, Netherlands Organization for Scientific Research Grant 903-40-204, Fondo de Investigación Sanitaria RCMN (C03/08) from Inst de Salud Carlos III, Chief Scientists Office Scottish Executive (K/MRS/50/C741), and Tenovus Scotland/Leng Trust.

### References

- Morreale de Escobar G, Obregon MJ, Escobar del Rey F 2000 Is neuropsychological development related to maternal hypothyroidism or to maternal hypothyroxinemia? *J Clin Endocrinol Metab* 85:3975–3987
- Xue-Yi C, Xin-Min J, Zhi-Jong D, Rakeman MA, Ming-Li Z, O'Donnell K, Tai M, Amette K, DeLong N, DeLong GR 1994 Timing of vulnerability of the brain to iodine deficiency in endemic cretinism. *N Engl J Med* 331:1739–1744
- Bleichrodt N, Born M 1994 A metaanalysis of research on iodine and its relationship to cognitive development. In: Stanbury JB, ed. *The damaged brain of iodine deficiency*. Elmsford, NY: Cognizant Communication Co.; 195–200
- Man EB, Serunian SA 1976 Thyroid function in human pregnancy. Development or retardation of 7-year-old progeny of hypothyroxinemic women. *Am J Obst Gynecol* 125:949–957
- Pop VJ, Kuijpers JL, van Baar AL, Verkerk G, van Son MM, de Vijlder JJ, Vulsma T, Wiersinga WM, Drexhage HA, Vader HL 1999 Low maternal free thyroxine concentrations during early pregnancy are associated with impaired psychomotor development in infancy. *Clin Endocrinol (Oxf)* 50:149–155
- Haddow JE, Palomaki GE, Allan WC, Williams JR, Knight GJ, Gagnon J, O'Heir CE, Mitchell ML, Hermos RJ, Waisbren SE, Faix JD, Klein RZ 1999 Maternal thyroid deficiency during pregnancy and subsequent neuropsychological development of the child. *N Engl J Med* 341:549–555
- Kopp P, van Sande J, Parma J, Duprez L, Gerber H, Joss E, Jameson JL, Dumont JE, Vassart G 1995 Brief report: congenital hyperthyroidism caused by a mutation in the thyrotropin-receptor gene. *N Engl J Med* 332:150–154
- Bernal J, Pekonen F 1984 Ontogenesis of the nuclear 3,5,3'-triiodothyroxine receptor in the human fetal brain. *Endocrinology* 114:677–679
- Myant NB 1958 Passage of thyroxine and triiodothyronine from mother to foetus in pregnant women. *Clin Sci* 17:75–79
- Contempré B, Jauniaux E, Calvo R, Jurkovic D, Campbell S, Morreale de Escobar G 1993 Detection of thyroid hormones in human embryonic cavities during the first trimester of pregnancy. *J Clin Endocrinol Metab* 77:1719–1722
- Calvo R, Obregon MJ, Ruiz de Oña C, Escobar del Rey F, Morreale de Escobar G 1990 Congenital hypothyroidism, as studied in rats. Crucial role of maternal thyroxine but not of 3,5,3'-triiodothyronine in the protection of the fetal brain. *J Clin Invest* 86:889–899
- Burrow GN, Fisher DA, Larsen PR 1994 Maternal and fetal thyroid function. *N Engl J Med* 331:1072–1078
- Vulsma T, Gons MH, de Vijlder JJM 1989 Maternal-fetal transfer of thyroxine in congenital hypothyroidism due to a total organification defect or thyroid agenesis. *N Engl J Med* 321:13–16
- Calvo RM, Jauniaux E, Gulbis B, Asunción M, Gervy C, Contempré B, Morreale de Escobar G 2002 Fetal tissues are exposed to biologically relevant free thyroxine concentrations during early phases of development. Possible consequences of maternal hypothyroxinemia. *J Clin Endocrinol Metab* 87:1768–1777
- Santini F, Chiovato L, Ghirri P, Lapi P, Mammoli C, Montanelli L, Scartabelli G, Ceccarini G, Coccoli L, Chopra IJ, Boldrini A, Pinchera A 1999 Serum iodothyronines in the human fetus and the newborn: evidence for an important role of placenta in fetal thyroid hormone homeostasis. *J Clin Endocrinol Metab* 84:493–498
- Ferreiro B, Bernal J, Goodyer CG, Branchard CL 1988 Estimation of nuclear thyroid hormone receptor saturation in human fetal brain and lung during early gestation. *J Clin Endocrinol Metab* 67:853–856
- Bernal J, Pérez-Castillo A, Pans T, Pekonen F 1984 Ontogenesis of thyroid hormone receptor. In: Labrie F, Proulx L, eds. *Endocrinology*. Amsterdam: Elsevier Science Publisher; 977–980
- Calvo R, Roda JM, Obregon MJ, Morreale de Escobar G 1998 Thyroid hormones in human tumoral and normal nervous tissues. *Brain Res* 801:150–157
- Hennemann G, Docter R, Friesema EC, de Jong M, Krenning EP, Visser TJ 2001 Plasma membrane transport of thyroid hormones and its role in thyroid hormone metabolism and bioavailability. *Endocr Rev* 22:451–476
- Bianco AC, Salvatore D, Gereben B, Berry MJ, Larsen PR 2002 Biochemistry, cellular and molecular biology, and physiological roles of the iodothyronine selenodeiodinases. *Endocr Rev* 23:38–89
- St Germain DL, Galton VA 1997 The deiodinase family of selenoproteins. *Thyroid* 7:655–668
- Kohrle J 1999 Local activation and inactivation of thyroid hormones: the deiodinase family. *Mol Cell Endocrinol* 151:103–119
- Croteau N, Davey JC, Galton VA, St Germain DL 1996 Cloning of the mammalian type II iodothyronine deiodinase. A selenoprotein differentially expressed and regulated in human and rat brain and other tissues. *J Clin Invest* 98:405–417
- Salvatore D, Tu H, Harney JW, Larsen PR 1996 Type 2 iodothyronine deiodinase is highly expressed in human thyroid. *J Clin Invest* 98:962–968
- Bartha T, Kim SW, Salvatore D, Gereben B, Tu HM, Harney JW, Rudas P, Larsen PR 2000 Characterization of the 5'-flanking and 5'-untranslated regions of the cyclic adenosine 3',5'-monophosphate-responsive human type 2 iodothyronine deiodinase gene. *Endocrinology* 141:229–237
- Guadaño-Ferraz A, Obregón MJ, St Germain DL, Bernal J 1997 The type 2 iodothyronine deiodinase is expressed primarily in glial cells in the neonatal rat brain. *Proc Natl Acad Sci USA* 94:10391–10396
- Tu HM, Kim SW, Salvatore D, Bartha T, Legradi G, Larsen PR, Lechan RM 1997 Regional distribution of type 2 thyroxine deiodinase messenger ribonucleic acid in rat hypothalamus and pituitary and its regulation by thyroid hormone. *Endocrinology* 138:3359–3368
- Galton VA, Martínez E, Hernandez A, St Germain EA, Bates JM, St Germain DL 1999 Pregnant rat uterus expresses high levels of the type 3 iodothyronine deiodinase. *J Clin Invest* 103:979–987
- Bates JM, St Germain DL, Galton VA 1999 Expression profiles of the three iodothyronine deiodinases, D1, D2, and D3, in the developing rat. *Endocrinology* 140:844–851
- Kaplan MM, Shaw EA 1984 Type II iodothyronine 5'-deiodination by human and rat placenta *in vitro*. *J Clin Endocrinol Metab* 59:253–257
- Koopdonk-Kool JM, de Vijlder JJ, Veenboer GJ, Ris-Stalpers C, Kok JH, Vulsma T, Boer K, Visser TJ 1996 Type II and type III deiodinase activity in human placenta as a function of gestational age. *J Clin Endocrinol Metab* 81:2154–2158
- Richard K, Hume R, Kaptein E, Sanders JP, van Toor H, de Herder WW, den Hollander JC, Krenning EP, Visser TJ 1998 Ontogeny of iodothyronine deiodinases in human liver. *J Clin Endocrinol Metab* 83:2868–2874
- Huang SA, Dorfman DM, Genest DR, Salvatore D, Larsen PR 2003 Type 3 iodothyronine deiodinase is highly expressed in the human uteroplacental unit and in fetal epithelium. *J Clin Endocrinol Metab* 88:1384–1388
- Tu HM, Legradi G, Bartha T, Salvatore D, Lechan RM, Larsen PR 1999 Regional expression of the type 3 iodothyronine deiodinase messenger ribonucleic acid in the rat central nervous system and its regulation by thyroid hormone. *Endocrinology* 140:784–790
- Escamez MJ, Guadaño-Ferraz A, Cuadrado A, Bernal J 1999 Type 3 iodothyronine deiodinase is selectively expressed in areas related to sexual differentiation in the newborn rat brain. *Endocrinology* 140:5443–5446
- Leonard JL, Farwell AP, Yen PM, Chin WW, Stula M 1994 Differential expression of thyroid hormone receptor isoforms in neurons and astroglial cells. *Endocrinology* 135:548–555
- Carlson DJ, Strait KA, Schwartz HL, Oppenheimer JH 1996 Thyroid hormone receptor isoform content in cultured type 1 and type 2 astrocytes. *Endocrinology* 137:911–917
- Bernal J 2002 Action of thyroid hormone in brain. *J Endocrinol Invest* 25:268–288
- Guadaño-Ferraz A, Bernal J 2003 The role of deiodinases during brain de-



- velopment. In: Morreale de Escobar G, deVijlder JJM, Butz S, Hostalek U, eds. The thyroid and brain. Stuttgart, Germany: Schattauer GmbH; 161–173
40. Kandel ER 1991 Brain and behaviour. In: Kandel ER, Schwartz JH, Jessell TM, eds. Principles of neural science. 3rd ed. New York: Elsevier
  41. Scammon RE, Calkins LA 1922 The development and growth of the external dimensions of the human body in the fetal period. Minneapolis: University of Minnesota Press
  42. Hume R, Kelly R, Cossar D, Giles M, Hallas A, Gourlay M, Bell J 1991 Self-differentiation of human lung organ culture: the role of prostaglandins PGE<sub>2</sub> and PGE<sub>2α</sub>. *Exp Cell Res* 194:111–117
  43. Morreale de Escobar G, Pastor R, Obregon MJ, Escobar del Rey F 1985 Effects of maternal hypothyroidism on the weight and thyroid hormone content of rat embryonic tissues, before and after onset of fetal thyroid function. *Endocrinology* 117:1890–1900
  44. Morreale de Escobar G, Calvo R, Escobar del Rey F, Obregon MJ 1994 Thyroid hormones in tissues from fetal and adult rats. *Endocrinology* 134:2410–2415
  45. Calvo R, Obregon MJ, Escobar del Rey F, Morreale de Escobar G 1992 The rat placenta and the transfer of thyroid hormones from the mother to the fetus. Effects of maternal thyroid status. *Endocrinology* 131:357–365
  46. Ruiz de Oña C, Morreale de Escobar G, Calvo R, Escobar del Rey F, Obregon MJ 1991 Thyroid hormones and 5'-deiodinase in the rat fetus late in gestation: effects of maternal hypothyroidism. *Endocrinology* 128:422–432
  47. Bradford MM 1976 A rapid and sensitive method for the quantitation of microgram quantities of protein utilizing the principle of protein-dye binding. *Anal Biochem* 72:248–254
  48. Hernández A, Obregón MJ 1995 Presence of growth factors-induced type III iodothyronine 5-deiodinase in cultured rat brown adipocytes. *Endocrinology* 136:4543–4550
  49. Ruiz de Oña C, Obregón MJ, Escobar del Rey F, Morreale de Escobar G 1988 Developmental changes in rat brain 5'-deiodinase and thyroid hormones during the fetal period: the effects of fetal hypothyroidism and maternal thyroid hormones. *Pediatr Res* 24:588–594
  50. Morreale de Escobar G, Ruiz-Marcos A, Escobar del Rey F 1983 Thyroid hormones and the developing brain. In: Dussault JH, Walker P, eds. Congenital hypothyroidism. New York: Marcel Dekker Inc.; 85–126
  51. Porterfield SP, Hendrich CE 1993 The role of thyroid hormones in prenatal and neonatal neurological development—current perspectives. *Endocr Rev* 14:94–106
  52. Jacobsson B 1989 Localization of transthyretin-mRNA and immunoreactive transthyretin in the human fetus. *Virchows Arch Pathol Anat* 415:259–263
  53. Palha JA, Hays MT, Morreale de Escobar G, Episkopou V, Gottesman M, Saraiva MJM 1997 Transthyretin is not essential for thyroxine to reach the brain and other tissues in a transthyretin-null mouse. *Am J Physiol Endocrinol Metab* 272:E485–E493
  54. Southwell BR, Duan W, Alcorn D, Brack C, Richardson SJ, Kohrle J, Schreiber G 1993 Thyroxine transport to the brain: role of protein synthesis by the choroid plexus. *Endocrinology* 133:2116–2126
  55. Karmarkar MG, Prabakaran D, Godbole MM 1993 5'-Monodeiodinase activity in developing human cerebral cortex. *Am J Clin Nutr* 57(Suppl):291S–294S
  56. Arem R, Wiener GJ, Kaplan SG, Kim H-S, Reichlin S, Kaplan MM 1993 Reduced tissue thyroid hormone levels in fatal illness. *Metabolism* 42:1102–1108
  57. DeLong GR 1993 The effects of nutrition on human brain development. *Am J Clin Nutrition* 57:290S–295S
  58. Lavado-Autric R, Ausó E, Garcia-Velasco VJ, Arufe MC, Escobar del Rey F, Berbel P, Morreale de Escobar G 2003 Early maternal hypothyroxinemia alters histogenesis and cerebral cortex cytoarchitecture of the progeny. *J Clin Invest* 111:1073–1082
  59. DeGroot L 1999 Dangerous dogmas in medicine: the non-thyroidal illness syndrome. *J Clin Endocrinol Metab* 84:151–164
  60. Peeters RP, Wouters PJ, Kaptein E, van Toor H, Visser TJ, Van den Berghe G 2003 Reduced activation and increased inactivation of thyroid hormone in tissues of critically ill patients. *J Clin Endocrinol Metab* 88:3202–3211
  61. Becker KB, Stephens KC, Davey JC, Schneider MJ, Galton VA 1997 The type 2 and type 3 iodothyronine deiodinases play important roles in coordinating development in *Rana catesbeiana* tadpoles. *Endocrinology* 138:2989–2997
  62. Marsh-Armstrong N, Huang H, Remo BF, Liu TT, Brown DD 1999 Asymmetric growth and development of the *Xenopus laevis* retina during metamorphosis is controlled by type III deiodinase. *Neuron* 24:871–878
  63. Campos-Barros A, Hoell T, Musa A, Sampaolo S, Stoltenburg G, Pinna G, Eravci M, Meinhold H, Baumgartner A 1996 Phenolic and tyrosyl ring iodothyronine deiodination and thyroid hormone concentrations in the human central nervous system. *J Clin Endocrinol Metab* 81:2179–2185
  64. Santini F, Pinchera A, Ceccarini G, Castagna M, Rosellini V, Mammoli C, Montanelli L, Zucchi V, Chopra IJ, Chiovato L 2001 Evidence for a role of the type III-iodothyronine deiodinase in the regulation of 3,5,3'-triiodothyronine content in the human central nervous system. *Eur J Endocrinol* 144:577–583
  65. Leonard JL, Farwell AP 1997 Thyroid hormone-regulated actin polymerization in brain. *Thyroid* 7:147–151
  66. Moreno M, Lanni A, Lombardi A, Goglia F 1997 How the thyroid controls metabolism in the rat: different roles for triiodothyronine and diiodothyronines. *J Physiol* 505:529–538

JCEM is published monthly by The Endocrine Society (<http://www.endo-society.org>), the foremost professional society serving the endocrine community.
